# Supplementary material
Source: PubMed Central journal article supplement (PMC2804346)
Supplement: supp_M109.055392_jbc.M109.055392-1.pdf [file supp_M109.055392_jbc.M109.055392-1.pdf]

# Supplemental Figure 1

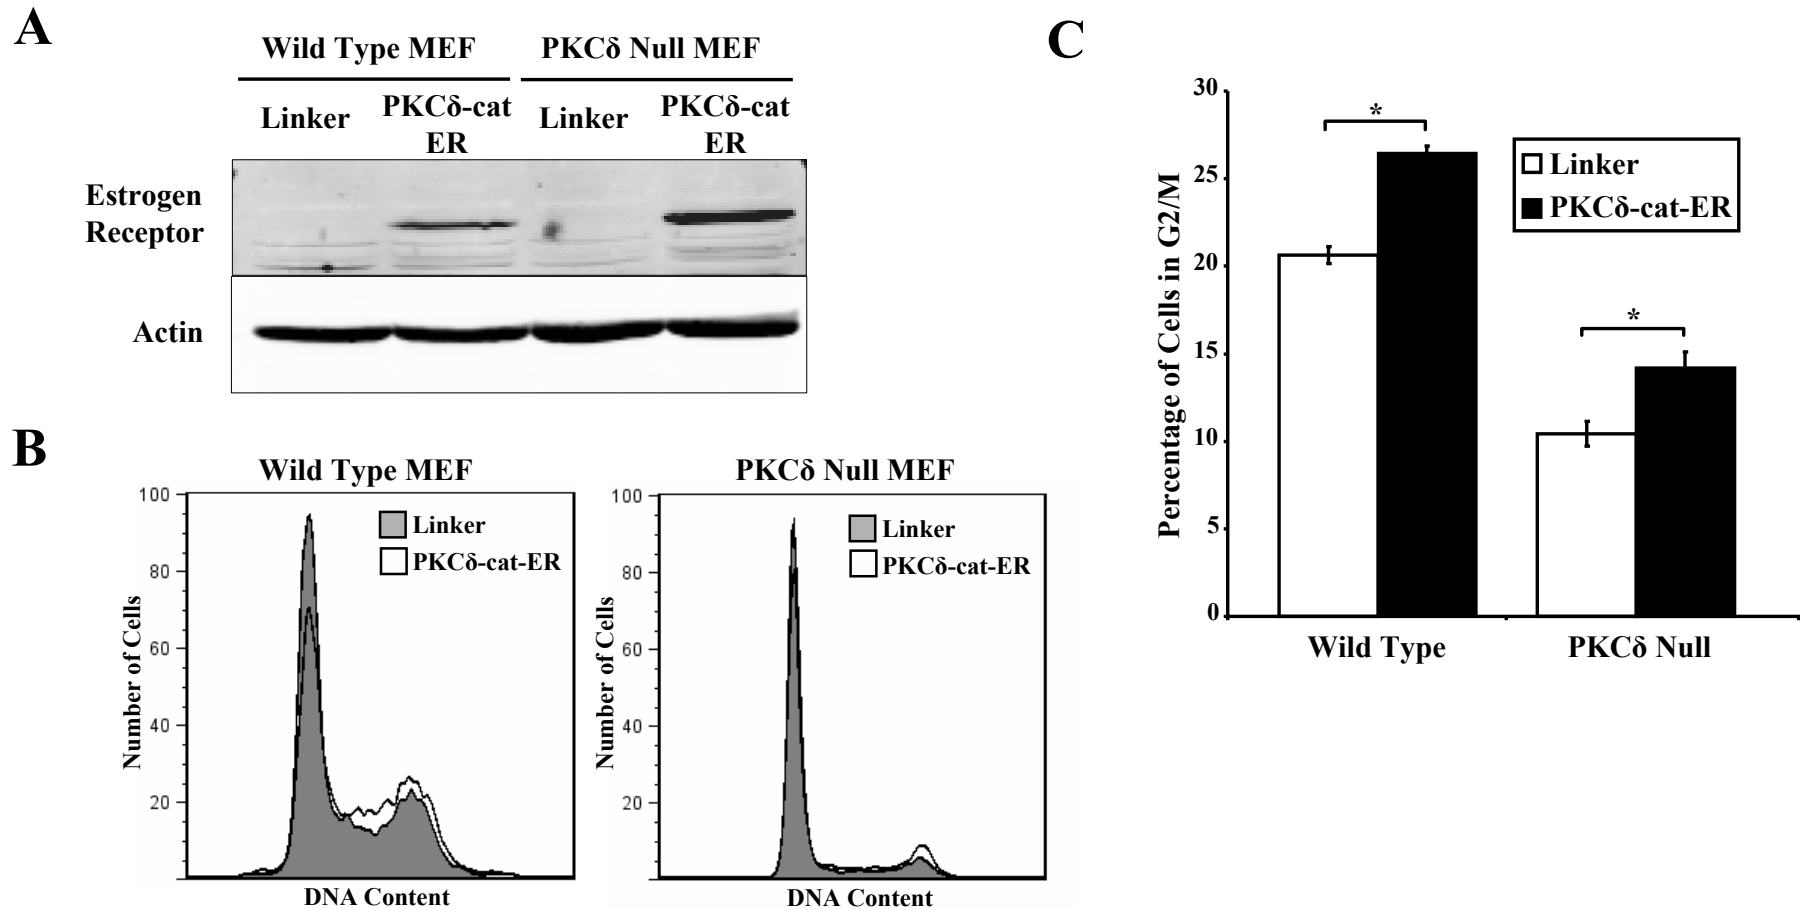

**SUPPLEMENTAL FIGURE 1. PKC $\delta$ -cat Induces G2/M Arrest in Wild Type and PKC $\delta$  Null MEFs.** *A*, Western Blot showing retrovirally transduced expression of PKC $\delta$ -cat-ER in wild type and PKC $\delta$  null MEFs. *B*, Wild type and PKC $\delta$  null MEFs were transduced with either Linker or PKC $\delta$ -cat-ER retrovirus, and after 3 days stained with PI and analyzed by flow cytometry. *C*, Quantitation of the percent of G2/M cells from panel *B*. \* Student's t-test value of  $p < 0.01$

## Supplemental Figure 2

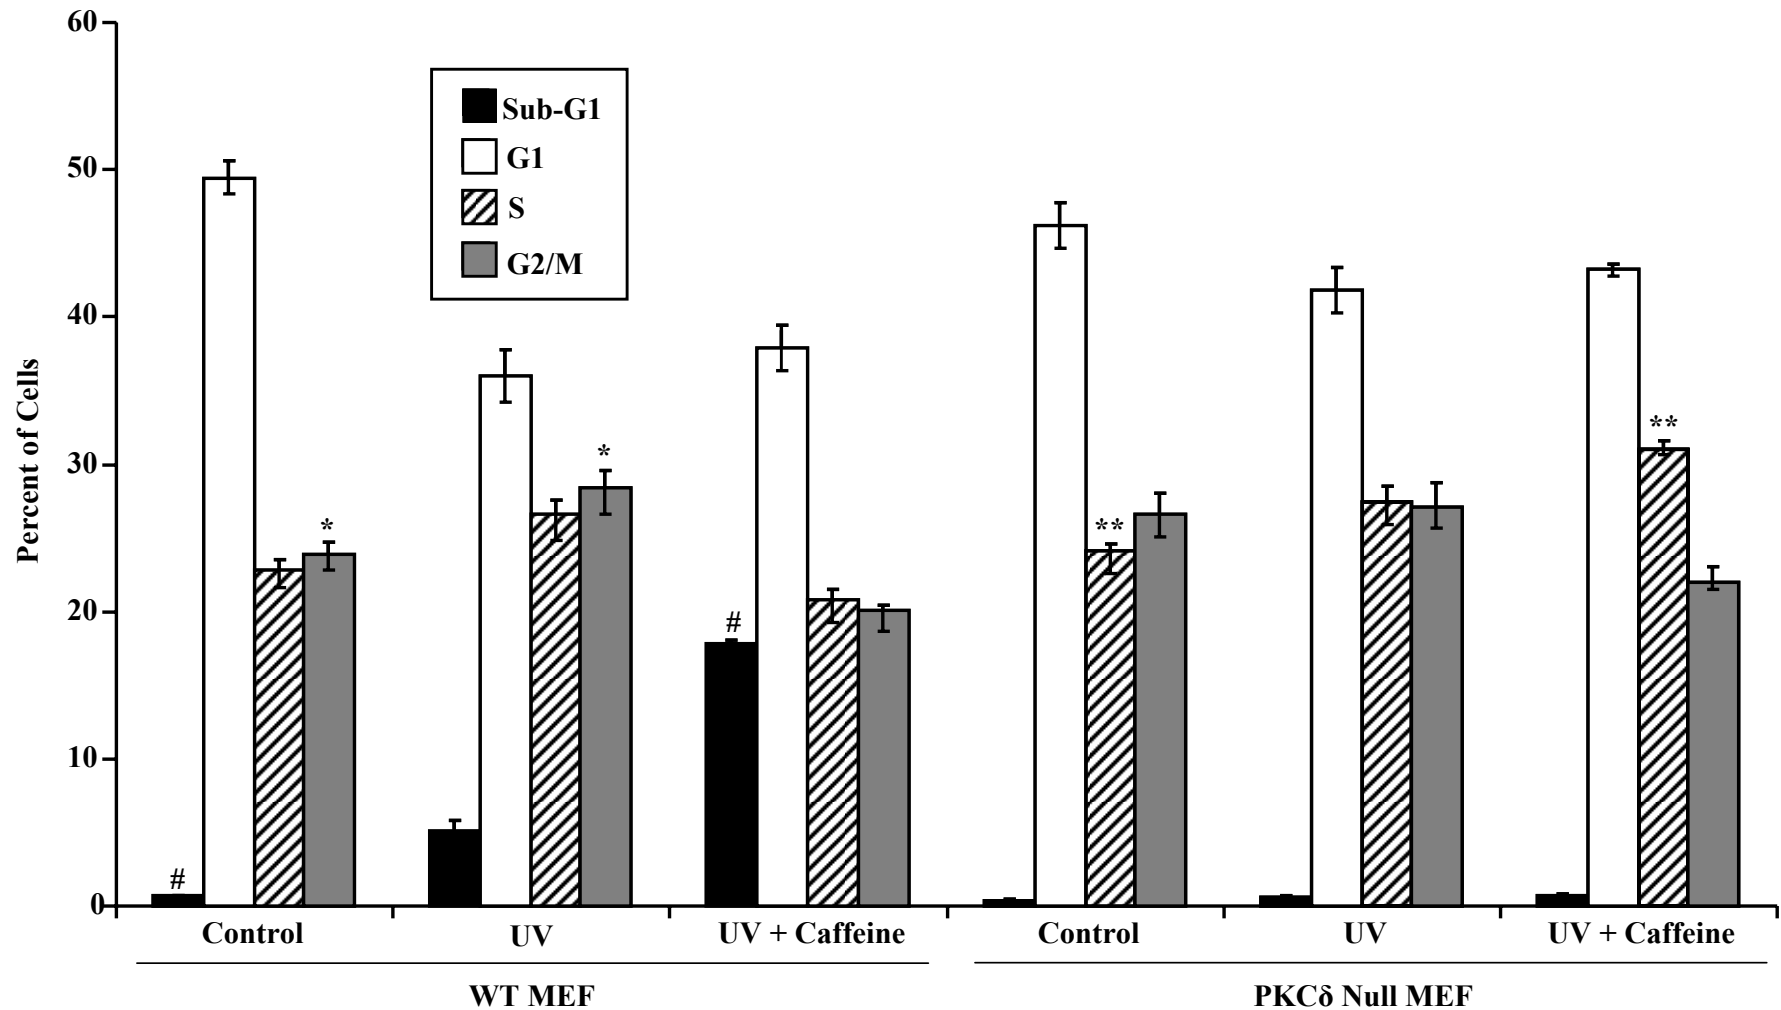

### SUPPLEMENTAL FIGURE 2. **Overriding the G2/M Checkpoint Induces UV Apoptosis in Wild Type but Not PKC $\delta$ Null MEFS.**

WT and PKC $\delta$  null MEFs were exposed to 30 mJ/cm<sup>2</sup> UV radiation in the presence or absence of 2 mM caffeine. Percentages of MEFs in each cell cycle phase are shown. Error bars denote the standard deviation of the mean from experiments performed in triplicate. \* Student's t-test value of  $p < 0.05$ ; # Student's t-test value of  $p < 0.05$ ; \*\* Student's t-test value of  $p < 10^{-4}$ .
